# Supplementary material
Source: PubMed Central journal article supplement (PMC1386768)
Supplement: biophysj_105.074344_1.pdf [file biophysj_105.074344_1.pdf]

# **Stereochemistry and Position-Dependent Effects of Carcinogens on TATA/TBP Binding**

## ***Supplementary Material***

**Qing Zhang<sup>†</sup>      Tamar Schlick\***

Department of Chemistry and Courant Institute of Mathematical Sciences, New York University, 251 Mercer Street, New York, NY 10012

\* To whom correspondence should be addressed (email: [schlick@nyu.edu](mailto:schlick@nyu.edu))

<sup>†</sup> Current address: Department of Molecular Biology, The Scripps Research Institute, 10550 North Torrey Pines Road, Mail Drop MB-5, La Jolla, CA 92037

## Appendix S1: Remodeling of TATA DNA

The TATA DNA in the experiment has 25 basepairs (bp), but we keep the length of 1CDW PDB DNA to be 16 bp without appending since the rest 9 bp are not in contact with TBP. We then modify the sequence of the 16 bp DNA to the corresponding experimental sequence.

Experimental sequence: 5'-GAATTCCG TATAAATA CGTGTCGTG-3'

PDB sequence: 5'-CTGC TATAAAAG GCTG-3'

Model sequence: 5'-TCCG TATAAATA CGTG-3'

Sequence remodeling is conducted on the relevant DNA bases only, not on sugars or backbone. We then check the changes of interactions on the DNA. The interactions on DNA (from TBP and crystal water molecules) are computed and plotted in schematic diagrams using the NUCPLOT program (Luscombe N M, Laskowski R A, Thornton J M. 1997. NUCPLOT: a program to generate schematic diagrams of protein-DNA interactions. *Nucleic Acids Research*, **25**, 4940-4945). Hydrogen bonds have a 3.00-Å cut-off, and nonbonded contacts have a 3.35-Å cut-off.

Since only the TATA box in the DNA contacts TBP and we only modify the bases of the last two basepairs in the TATA box (from AG to TA), we only need to know the interaction changes between TBP and the last four DNA bases in the TATA box: A11, G12, C105, T106 (see Figure 1). We find one nonbonded contact on the base of T106: T106:O2---Phe193:CZ (from phenylalanine A193) before sequence remodeling.

After sequence remodeling, all the interactions on DNA are calculated again and plotted in a new schematic diagram (Figure 2). We find there is one nonbonded contact from Phe193 on the base of A106: A106:N3---Phe193:CZ. The only difference from previous contact is that the atom T106:O2 becomes A106:N3, and both atoms lie in the minor groove, thus our remodeling process is reasonable.

*Note: All the residue numbers in this appendix are from the PDB file (ID: 1CDW).*

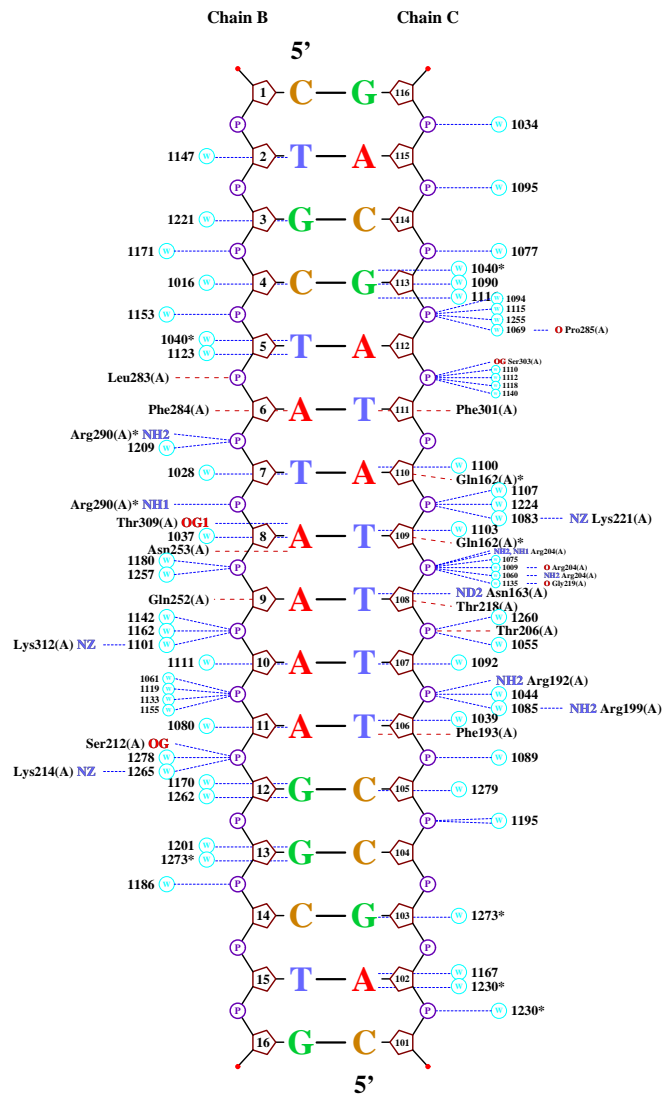

**Key**

- 3 Backbone sugar and base-number
- P Phosphate group
- \* Residue/water on plot more than once
- Hydrogen bond to DNA
- Nonbonded contact to DNA (< 3.35Å)
- 88 W Water molecule and number

**1CDW**

Figure 1: Interactions on 1CDW DNA before Modeling.

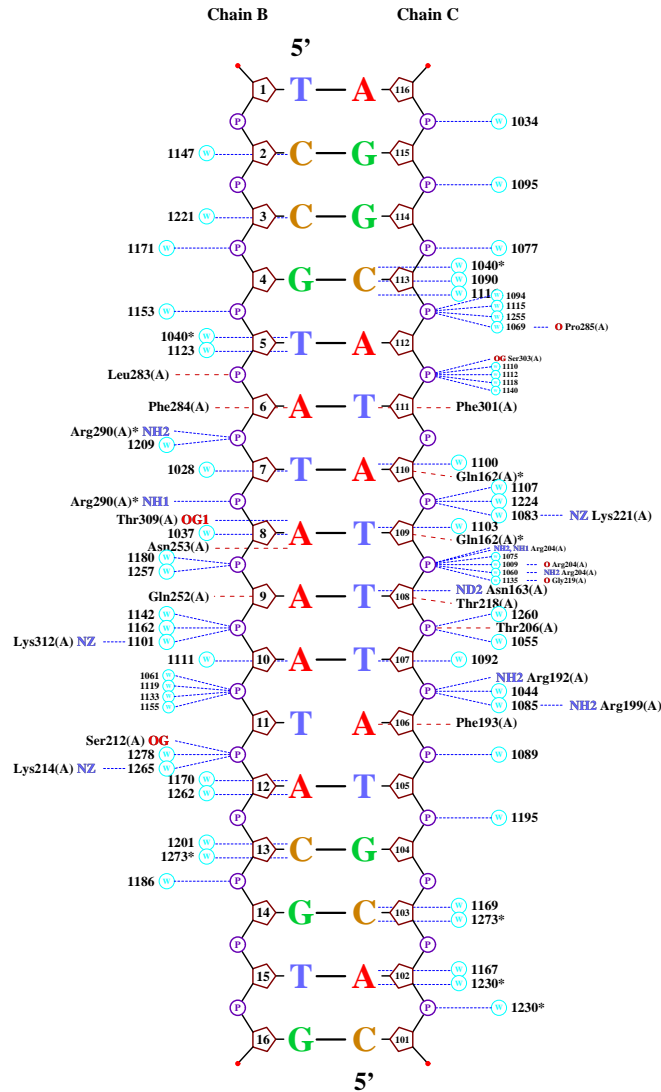

**Key**

- 3 Backbone sugar and base-number
- P Phosphate group
- \* Residue/water on plot more than once
- Hydrogen bond to DNA
- Nonbonded contact to DNA (< 3.35Å)
- 88 W Water molecule and number

**1CDW.remold**

Figure 2: Interactions on 1CDW DNA after Modeling.

## Appendix S2: Partial Charges and Other Added Force Field Parameters of BP-Adenine Adducts

**Table 1: Partial charges, atom types, and topologies, of 10S(+) and 10R(-)-trans-anti-[BP]-N<sup>6</sup>-dA adducts at the position A<sub>1</sub> of the TATA box.**

| atom name | atom type | topology | partial charge                 |         |                                |         |         |
|-----------|-----------|----------|--------------------------------|---------|--------------------------------|---------|---------|
|           |           |          | 10S(+)-trans-[A <sub>1</sub> ] |         | 10R(-)-trans-[A <sub>1</sub> ] |         |         |
|           |           |          | II                             | III     | II                             | III     | IV      |
| P         | P         | M        | 1.2209                         | 1.2212  | 1.2212                         | 1.2212  | 1.2216  |
| O1P       | O2        | E        | -0.7932                        | -0.7936 | -0.7931                        | -0.7939 | -0.7930 |
| O2P       | O2        | E        | -0.7932                        | -0.7936 | -0.7931                        | -0.7939 | -0.7930 |
| O5'       | OS        | M        | -0.4914                        | -0.4890 | -0.4964                        | -0.4873 | -0.5033 |
| C5'       | CT        | M        | -0.0337                        | -0.0152 | -0.0367                        | -0.0023 | 0.0236  |
| H5'1      | H1        | E        | 0.0795                         | 0.0847  | 0.0842                         | 0.0810  | 0.0655  |
| H5'2      | H1        | E        | 0.0795                         | 0.0847  | 0.0842                         | 0.0810  | 0.0655  |
| C4'       | CT        | M        | 0.2233                         | 0.1069  | 0.1927                         | 0.0831  | 0.0893  |
| H4'       | H1        | E        | 0.0944                         | 0.1329  | 0.1067                         | 0.1381  | 0.1246  |
| O4'       | OS        | S        | -0.4220                        | -0.3721 | -0.3971                        | -0.3492 | -0.3134 |
| C1'       | CT        | B        | 0.2145                         | 0.1059  | 0.0940                         | 0.0381  | 0.0161  |
| H1'       | H2        | E        | 0.1301                         | 0.1620  | 0.1610                         | 0.1777  | 0.1485  |
| N9        | N*        | B        | -0.0899                        | -0.0100 | -0.0344                        | -0.0358 | -0.0697 |
| C8        | CK        | S        | 0.1461                         | 0.0584  | 0.1268                         | 0.1150  | 0.1104  |
| H8        | H5        | E        | 0.1854                         | 0.1991  | 0.1938                         | 0.2022  | 0.1579  |
| C4        | CB        | B        | 0.4535                         | 0.4741  | 0.4964                         | 0.4896  | 0.3803  |
| N3        | NC        | E        | -0.7712                        | -0.8080 | -0.7845                        | -0.8019 | -0.4965 |
| C5        | CB        | B        | 0.0804                         | -0.0081 | 0.0260                         | 0.0453  | 0.0811  |
| N7        | NB        | E        | -0.5937                        | -0.4918 | -0.5855                        | -0.5690 | -0.5258 |
| C6        | CA        | B        | 0.4756                         | 0.5417  | 0.4930                         | 0.4451  | 0.4134  |
| N1        | NC        | S        | -0.7193                        | -0.7978 | -0.7339                        | -0.7816 | -0.6829 |
| C2        | CQ        | S        | 0.6061                         | 0.6830  | 0.6118                         | 0.6803  | 0.4448  |
| H2        | H5        | E        | 0.0439                         | 0.0373  | 0.0467                         | 0.0297  | 0.0562  |
| N6        | N2        | B        | -0.4766                        | -0.4544 | -0.4421                        | -0.3934 | -0.3821 |
| H6        | H         | E        | 0.3166                         | 0.3108  | 0.2948                         | 0.2860  | 0.2674  |
| CC1       | CT        | B        | 0.0259                         | 0.0116  | 0.0245                         | 0.0356  | 0.0265  |
| HC1       | H1        | E        | 0.1196                         | 0.1104  | 0.1708                         | 0.1665  | 0.1646  |
| CC2       | CT        | 3        | -0.0224                        | 0.0019  | 0.0070                         | 0.0541  | 0.0192  |
| HC2       | H1        | E        | 0.1529                         | 0.1372  | 0.1807                         | 0.1580  | 0.1743  |
| O9        | OH        | S        | -0.6752                        | -0.6496 | -0.6666                        | -0.6818 | -0.6812 |
| HO9       | HO        | E        | 0.4583                         | 0.4305  | 0.4641                         | 0.4684  | 0.4749  |
| CC3       | CT        | 3        | 0.1060                         | 0.0836  | 0.0450                         | 0.0526  | 0.0371  |
| HC3       | H1        | E        | 0.1324                         | 0.1292  | 0.0878                         | 0.0850  | 0.0954  |

|      |    |   |         |         |         |         |         |
|------|----|---|---------|---------|---------|---------|---------|
| O8   | OH | S | -0.6475 | -0.6451 | -0.6541 | -0.6621 | -0.6592 |
| HO8  | HO | E | 0.4443  | 0.4419  | 0.4407  | 0.4430  | 0.4473  |
| CC4  | CT | 3 | 0.2329  | 0.2682  | 0.2844  | 0.2459  | 0.2314  |
| HC4  | H1 | E | 0.1549  | 0.1424  | 0.1203  | 0.1310  | 0.1349  |
| O7   | OH | S | -0.6733 | -0.6804 | -0.6847 | -0.6782 | -0.6780 |
| HO7  | HO | E | 0.4313  | 0.4328  | 0.4214  | 0.4226  | 0.4230  |
| CC5  | CA | S | -0.1012 | -0.1021 | -0.0748 | -0.0821 | -0.0494 |
| CC6  | CA | B | -0.2048 | -0.2065 | -0.2274 | -0.2257 | -0.2443 |
| HC6  | HA | E | 0.1698  | 0.1707  | 0.1631  | 0.1626  | 0.1655  |
| CC7  | CA | B | 0.0282  | 0.0348  | 0.0291  | 0.0414  | 0.0491  |
| C20  | CA | E | 0.0337  | 0.0338  | 0.0272  | 0.0181  | 0.0213  |
| CC8  | CA | B | -0.1631 | -0.1687 | -0.1540 | -0.1550 | -0.1626 |
| HC8  | HA | E | 0.1424  | 0.1431  | 0.1413  | 0.1375  | 0.1406  |
| CC9  | CA | B | -0.2057 | -0.2051 | -0.2172 | -0.2115 | -0.2028 |
| HC9  | HA | E | 0.1463  | 0.1476  | 0.1491  | 0.1497  | 0.1450  |
| C10  | CA | B | 0.0532  | 0.0487  | 0.0592  | 0.0468  | 0.0534  |
| C19  | CA | E | 0.0929  | 0.1211  | 0.1010  | 0.1225  | 0.0995  |
| C11  | CA | B | -0.1396 | -0.1609 | -0.1454 | -0.1701 | -0.1532 |
| HC11 | HA | E | 0.1399  | 0.1436  | 0.1419  | 0.1476  | 0.1439  |
| C12  | CA | B | -0.2301 | -0.2048 | -0.2292 | -0.1959 | -0.2151 |
| HC12 | HA | E | 0.1656  | 0.1580  | 0.1650  | 0.1578  | 0.1623  |
| C13  | CA | B | -0.1489 | -0.1521 | -0.1406 | -0.1639 | -0.1515 |
| HC13 | HA | E | 0.1442  | 0.1423  | 0.1413  | 0.1443  | 0.1421  |
| C14  | CA | S | 0.0487  | 0.0399  | 0.0411  | 0.0539  | 0.0446  |
| C15  | CA | B | -0.2041 | -0.2352 | -0.2104 | -0.2218 | -0.2029 |
| HC15 | HA | E | 0.1523  | 0.1570  | 0.1556  | 0.1563  | 0.1509  |
| C16  | CA | B | -0.2045 | -0.1347 | -0.1823 | -0.1565 | -0.1454 |
| HC16 | HA | E | 0.1758  | 0.1374  | 0.1561  | 0.1550  | 0.1327  |
| C17  | CA | S | 0.0289  | -0.0011 | 0.0251  | 0.0005  | -0.0153 |
| C18  | CA | E | 0.0225  | 0.0149  | 0.0301  | 0.0325  | 0.0545  |
| C3'  | CT | M | 0.0337  | 0.0396  | 0.0502  | 0.0291  | 0.0375  |
| H3'  | H1 | E | 0.1112  | 0.1178  | 0.1126  | 0.1218  | 0.1296  |
| C2'  | CT | B | -0.0695 | -0.0563 | -0.0814 | -0.0418 | -0.0308 |
| H2'1 | HC | E | 0.0502  | 0.0544  | 0.0598  | 0.0562  | 0.0526  |
| H2'2 | HC | E | 0.0502  | 0.0544  | 0.0598  | 0.0562  | 0.0526  |
| O3'  | OS | M | -0.5241 | -0.5151 | -0.5238 | -0.5111 | -0.5209 |

**Table 2: Partial charges, atom types, and topologies, of 10S(+) and 10R(-)-*trans-anti*-[BP]-N<sup>6</sup>-dA adducts at the position A<sub>2</sub> of the TATA box.**

| atom name | atom type | topology | partial charge                          |         |         |                                         |         |         |
|-----------|-----------|----------|-----------------------------------------|---------|---------|-----------------------------------------|---------|---------|
|           |           |          | 10S(+)- <i>trans</i> -[A <sub>2</sub> ] |         |         | 10R(-)- <i>trans</i> -[A <sub>2</sub> ] |         |         |
|           |           |          | III                                     | III-2   | IV      | I                                       | III     | IV      |
| P         | P         | M        | 1.2212                                  | 1.2212  | 1.2212  | 1.2211                                  | 1.2208  | 1.2208  |
| O1P       | O2        | E        | -0.7930                                 | -0.7930 | -0.7930 | -0.7928                                 | -0.7928 | -0.7928 |
| O2P       | O2        | E        | -0.7930                                 | -0.7930 | -0.7930 | -0.7928                                 | -0.7928 | -0.7928 |
| O5'       | OS        | M        | -0.4972                                 | -0.4972 | -0.4972 | -0.4987                                 | -0.4947 | -0.4947 |
| C5'       | CT        | M        | -0.0085                                 | -0.0085 | -0.0085 | 0.0304                                  | 0.0615  | 0.0615  |
| H5'1      | H1        | E        | 0.0919                                  | 0.0919  | 0.0919  | 0.0783                                  | 0.0657  | 0.0657  |
| H5'2      | H1        | E        | 0.0919                                  | 0.0919  | 0.0919  | 0.0783                                  | 0.0657  | 0.0657  |
| C4'       | CT        | M        | 0.0634                                  | 0.0634  | 0.0634  | 0.0704                                  | 0.0844  | 0.0844  |
| H4'       | H1        | E        | 0.1397                                  | 0.1397  | 0.1397  | 0.1336                                  | 0.1239  | 0.1239  |
| O4'       | OS        | S        | -0.3451                                 | -0.3451 | -0.3451 | -0.3532                                 | -0.3647 | -0.3648 |
| C1'       | CT        | B        | 0.0575                                  | 0.0575  | 0.0575  | 0.0346                                  | 0.0506  | 0.0506  |
| H1'       | H2        | E        | 0.1426                                  | 0.1426  | 0.1426  | 0.1588                                  | 0.1484  | 0.1484  |
| N9        | N*        | B        | -0.0006                                 | -0.0006 | -0.0006 | -0.0455                                 | -0.0214 | -0.0214 |
| C8        | CK        | S        | 0.0522                                  | 0.0523  | 0.0523  | 0.1695                                  | 0.1229  | 0.1229  |
| H8        | H5        | E        | 0.1969                                  | 0.1969  | 0.1969  | 0.1716                                  | 0.1754  | 0.1754  |
| C4        | CB        | B        | 0.4703                                  | 0.4703  | 0.4704  | 0.4591                                  | 0.4633  | 0.4633  |
| N3        | NC        | E        | -0.8104                                 | -0.8104 | -0.8104 | -0.7908                                 | -0.8108 | -0.8109 |
| C5        | CB        | B        | -0.0120                                 | -0.0118 | -0.0119 | 0.0742                                  | 0.0442  | 0.0442  |
| N7        | NB        | E        | -0.4877                                 | -0.4877 | -0.4877 | -0.6090                                 | -0.5572 | -0.5572 |
| C6        | CA        | B        | 0.6011                                  | 0.6007  | 0.6007  | 0.4802                                  | 0.4633  | 0.4633  |
| N1        | NC        | S        | -0.8096                                 | -0.8096 | -0.8095 | -0.7455                                 | -0.7870 | -0.7870 |
| C2        | CQ        | S        | 0.6799                                  | 0.6798  | 0.6798  | 0.6419                                  | 0.6887  | 0.6887  |
| H2        | H5        | E        | 0.0386                                  | 0.0386  | 0.0387  | 0.0399                                  | 0.0293  | 0.0293  |
| N6        | N2        | B        | -0.5362                                 | -0.5357 | -0.5357 | -0.4859                                 | -0.4078 | -0.4079 |
| H6        | H         | E        | 0.3363                                  | 0.3361  | 0.3361  | 0.3100                                  | 0.2869  | 0.2869  |
| CC1       | CT        | B        | 0.0014                                  | 0.0015  | 0.0015  | 0.0258                                  | 0.0243  | 0.0243  |
| HC1       | H1        | E        | 0.1119                                  | 0.1118  | 0.1118  | 0.1701                                  | 0.1692  | 0.1692  |
| CC2       | CT        | 3        | 0.0044                                  | 0.0044  | 0.0044  | 0.0351                                  | 0.0377  | 0.0377  |
| HC2       | H1        | E        | 0.1305                                  | 0.1304  | 0.1304  | 0.1700                                  | 0.1599  | 0.1599  |
| O9        | OH        | S        | -0.6594                                 | -0.6594 | -0.6594 | -0.6755                                 | -0.6778 | -0.6778 |
| HO9       | HO        | E        | 0.4389                                  | 0.4390  | 0.4390  | 0.4631                                  | 0.4659  | 0.4659  |
| CC3       | CT        | 3        | 0.1252                                  | 0.1253  | 0.1255  | 0.0913                                  | 0.0628  | 0.0628  |
| HC3       | H1        | E        | 0.1227                                  | 0.1226  | 0.1226  | 0.0739                                  | 0.0816  | 0.0816  |
| O8        | OH        | S        | -0.6544                                 | -0.6544 | -0.6544 | -0.6629                                 | -0.6620 | -0.6620 |
| HO8       | HO        | E        | 0.4415                                  | 0.4415  | 0.4416  | 0.4358                                  | 0.4388  | 0.4388  |
| CC4       | CT        | 3        | 0.2593                                  | 0.2595  | 0.2595  | 0.2940                                  | 0.3009  | 0.3009  |
| HC4       | H1        | E        | 0.1434                                  | 0.1433  | 0.1433  | 0.1129                                  | 0.1138  | 0.1138  |

|      |    |   |         |         |         |         |         |         |
|------|----|---|---------|---------|---------|---------|---------|---------|
| O7   | OH | S | -0.6825 | -0.6825 | -0.6823 | -0.6854 | -0.6857 | -0.6857 |
| HO7  | HO | E | 0.4320  | 0.4319  | 0.4318  | 0.4181  | 0.4174  | 0.4174  |
| CC5  | CA | S | -0.0993 | -0.0994 | -0.0995 | -0.0995 | -0.0897 | -0.0897 |
| CC6  | CA | B | -0.2022 | -0.2022 | -0.2023 | -0.2004 | -0.2305 | -0.2305 |
| HC6  | HA | E | 0.1702  | 0.1702  | 0.1701  | 0.1559  | 0.1597  | 0.1597  |
| CC7  | CA | B | 0.0297  | 0.0297  | 0.0298  | 0.0254  | 0.0508  | 0.0509  |
| C20  | CA | E | 0.0237  | 0.0237  | 0.0237  | 0.0180  | 0.0154  | 0.0154  |
| CC8  | CA | B | -0.1585 | -0.1585 | -0.1585 | -0.1694 | -0.1580 | -0.1580 |
| HC8  | HA | E | 0.1424  | 0.1424  | 0.1424  | 0.1457  | 0.1394  | 0.1394  |
| CC9  | CA | B | -0.2212 | -0.2212 | -0.2212 | -0.1994 | -0.2244 | -0.2244 |
| HC9  | HA | E | 0.1516  | 0.1516  | 0.1516  | 0.1440  | 0.1520  | 0.1520  |
| C10  | CA | B | 0.0674  | 0.0674  | 0.0674  | 0.0589  | 0.0637  | 0.0637  |
| C19  | CA | E | 0.1164  | 0.1164  | 0.1164  | 0.1024  | 0.1204  | 0.1204  |
| C11  | CA | B | -0.1758 | -0.1758 | -0.1758 | -0.1529 | -0.1691 | -0.1691 |
| HC11 | HA | E | 0.1482  | 0.1482  | 0.1482  | 0.1429  | 0.1480  | 0.1480  |
| C12  | CA | B | -0.2044 | -0.2044 | -0.2044 | -0.2146 | -0.2087 | -0.2087 |
| HC12 | HA | E | 0.1588  | 0.1588  | 0.1588  | 0.1622  | 0.1611  | 0.1611  |
| C13  | CA | B | -0.1440 | -0.1440 | -0.1440 | -0.1549 | -0.1610 | -0.1610 |
| HC13 | HA | E | 0.1407  | 0.1407  | 0.1407  | 0.1442  | 0.1438  | 0.1438  |
| C14  | CA | S | 0.0364  | 0.0364  | 0.0364  | 0.0484  | 0.0598  | 0.0598  |
| C15  | CA | B | -0.2458 | -0.2458 | -0.2458 | -0.2254 | -0.2383 | -0.2383 |
| HC15 | HA | E | 0.1602  | 0.1602  | 0.1602  | 0.1600  | 0.1609  | 0.1609  |
| C16  | CA | B | -0.1246 | -0.1246 | -0.1246 | -0.1701 | -0.1401 | -0.1401 |
| HC16 | HA | E | 0.1364  | 0.1364  | 0.1364  | 0.1605  | 0.1455  | 0.1454  |
| C17  | CA | S | 0.0101  | 0.0101  | 0.0101  | 0.0267  | 0.0017  | 0.0017  |
| C18  | CA | E | 0.0180  | 0.0181  | 0.0182  | 0.0344  | 0.0316  | 0.0316  |
| C3'  | CT | M | 0.1127  | 0.1128  | 0.1127  | 0.1311  | 0.1338  | 0.1337  |
| H3'  | H1 | E | 0.1131  | 0.1130  | 0.1131  | 0.1082  | 0.0988  | 0.0989  |
| C2'  | CT | B | -0.0954 | -0.0955 | -0.0955 | -0.1337 | -0.1032 | -0.1031 |
| H2'1 | HC | E | 0.0773  | 0.0774  | 0.0774  | 0.0880  | 0.0774  | 0.0773  |
| H2'2 | HC | E | 0.0773  | 0.0774  | 0.0774  | 0.0880  | 0.0774  | 0.0773  |
| O3'  | OS | M | -0.5247 | -0.5248 | -0.5247 | -0.5284 | -0.5310 | -0.5310 |

**Table 3: Other added force field parameters**

| angle type | force constant $K_\theta$<br>(kcal/mol/rad <sup>2</sup> ) | angle value $\theta_{eq}$<br>(°) |
|------------|-----------------------------------------------------------|----------------------------------|
| OH-CT-CA   | 65.8                                                      | 112.61                           |
| N2-CT-CA   | 50.0                                                      | 108.75                           |
| H1-CT-CA   | 63.0                                                      | 108.93                           |



## Appendix S3: Convergence of Benzo[a]pyrene Torsions

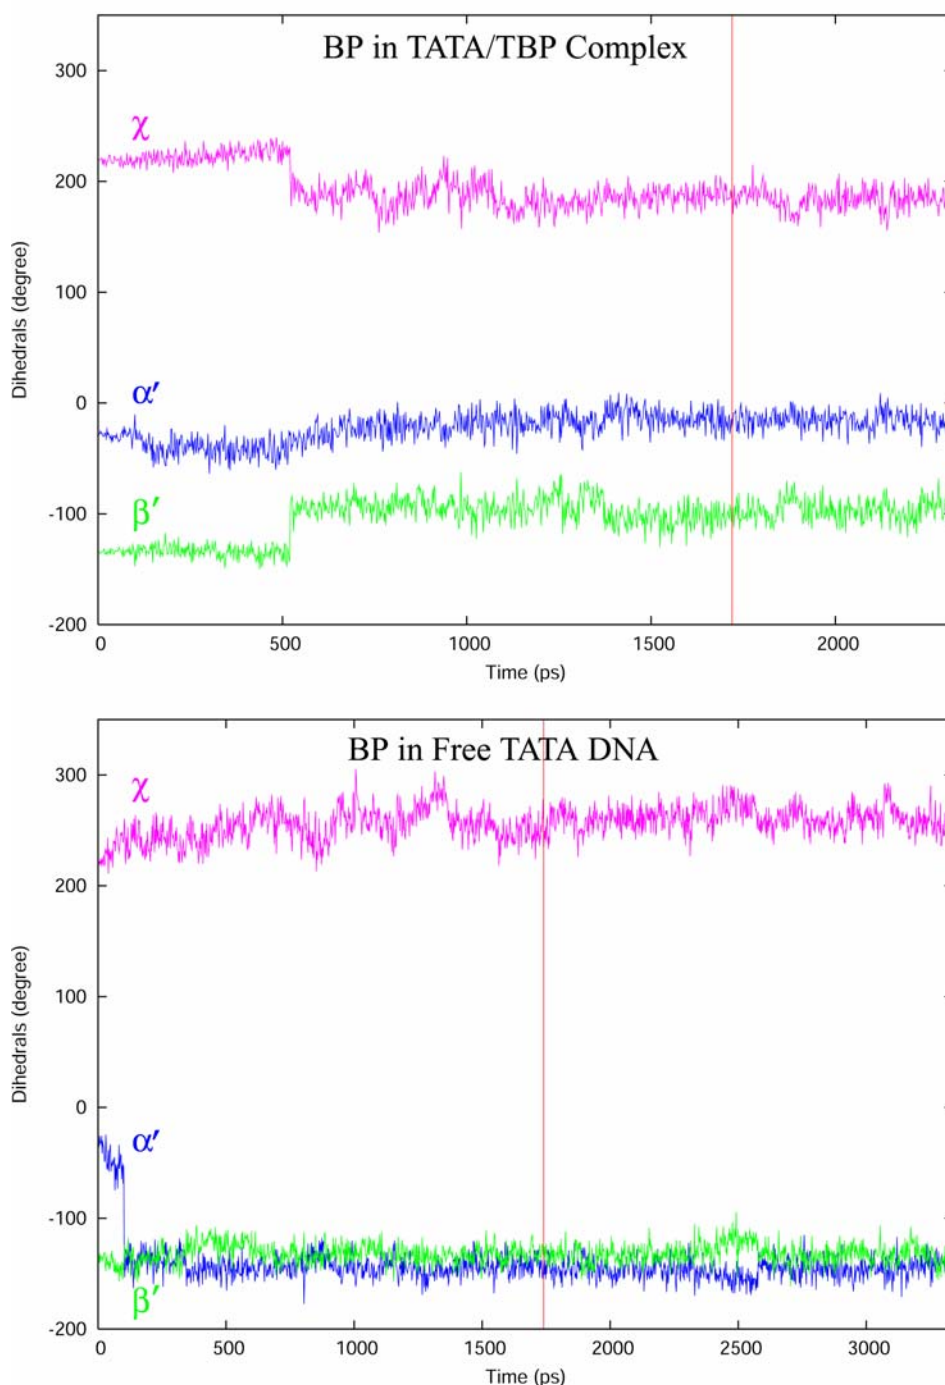

Figure 1: Torsions of benzo[a]pyrene in 10*S*(+)-*trans*-[A<sub>1</sub>]: II as a function of simulation time. The torsions are  $\chi$  (O4'-C1'-N9-C4),  $\alpha'$  (N1-C6-N6-C10(BP)),  $\beta'$  (C6-N6-C10(BP)-C9(BP)) are shown in Figure 1 of the manuscript. To the right of the vertical red line is the trajectory for structural and thermodynamic analyses. Top: benzo[a]pyrene in the TATA/TBP complex. Bottom: benzo[a]pyrene in the free TATA DNA.

## Appendix S4: Computing Standard Gibbs Energy Changes (Binding Free Energies) From Experimental Data (EMSA)

To compute the standard Gibbs energy (free energy) change  $\Delta G^\circ$ , we have to find the equilibrium constant  $K^\circ$ , which can be calculated from the activities of reactants and products at equilibrium state.

### 1. Defining standard Gibbs energy change and equilibrium constant

We have

$$\Delta G^\circ = -RT \ln K^\circ, \quad (1)$$

$$K^\circ = \prod_i (a_i)^{\nu_i} = \prod_i (\gamma_i x_i)^{\nu_i}, \quad (2)$$

where  $\Delta G^\circ$  is the standard Gibbs energy change (J);  $K^\circ$  is the equilibrium constant;  $R$  is the gas constant (8.3145J/mol·K);  $T$  is the absolute temperature (K);  $a_i$ ,  $\gamma_i$ ,  $x_i$ , and  $\nu_i$  are the activity, activity coefficient, mole fraction, and stoichiometric coefficient of solute  $i$ , respectively.

In our project, we are concerned with the reaction: DNA + TBP  $\leftrightarrow$  DNA/TBP, the latter is monomeric DNA/TBP complex. Because the initial molar concentrations in reaction solution are 1 nM for DNA and 0-70 nM for TBP, this solution is dilute and the activity coefficients  $\gamma$  of DNA, TBP, and monomeric DNA/TBP complex are all close to 1. The stoichiometric coefficients  $\nu$  of DNA, TBP, and monomeric DNA/TBP complex are 1. Thus, the equilibrium constant for this reaction is

$$K^\circ = \frac{x(\text{monomericDNA/TBPcomplex})}{x(\text{freeDNA}) \cdot x(\text{freeTBP})}. \quad (3)$$

If we use the molar concentration scale for the activities of the solutes, we will have

$$K^\circ = \frac{[\text{monomericDNA/TBPcomplex}] / c^\circ}{([\text{freeDNA}] / c^\circ) \cdot ([\text{freeTBP}] / c^\circ)} = \frac{[\text{monomericDNA/TBPcomplex}] \times c^\circ}{[\text{freeDNA}] \cdot [\text{freeTBP}]}, \quad (4)$$

where  $[i]$  represents the molar concentration (M) of solute  $i$ ,  $c^\circ$  is the standard molar concentration (1 M).

### 2. Calculating standard Gibbs energy change and equilibrium constant

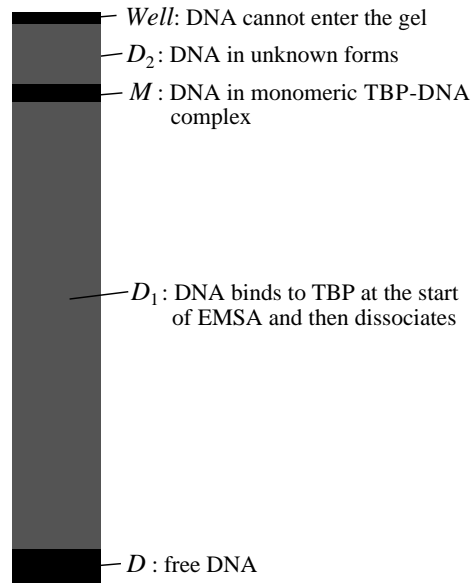

Figure 1: One lane of gel after EMSA.

To input the molar concentrations into Equation 4, we must interpret the electrophoretic mobility shift assays (EMSA) in Rechkoblit et al. 2001. Figure 1 shows one lane of a gel after EMSA.

The *Well*,  $D_2$ ,  $M$ ,  $D_1$ ,  $D$  reflect DNA in different forms. We use *italic* font to represent these symbols as the molar concentrations. Our calculation will be based on the Table 2 in Rechkoblit et al. 2001 and the analysis of Figure 1 here. Table 2 in Rechkoblit et al. 2001 gives the apparent dissociation constants  $K_d$  (i.e., the initial molar concentration of TBP at which totally 50% DNA is bound to TBP in different forms) and the fractions of DNA in the monomeric DNA/TBP complex form corresponding to  $K_d$ .

### 3. Approximations

Since the information in the gel is complicated, we make two approximations:

- 1)  $Well = 0$ . When 50% DNA is bound to TBP, the band of *Well* is weak in each gel (see Figure 4 of Rechkoblit et al., 2001), so the amount of DNA left in the *Well* can be neglected;
- 2)  $D_2 = 0$ .  $D_2$  part is also weak and its length is much shorter than  $D_1$ , so the initial molar concentration of DNA will be  $D_{initial} = M + D + D_1 = 1$  nM.

Based on these two approximations, we can see that DNA has only two forms in the gel (excluding *Well*): free DNA and DNA in monomeric DNA/TBP complex. Since  $Well = 0$  and  $D_2 = 0$ , we only have to consider what form of DNA is in  $D_1$  part. The DNA in  $D_1$  has larger mobility than monomeric DNA/TBP complex ( $M$ ) and smaller mobility than free DNA ( $D$ ), so  $D_1$  has the DNA that is initially bound to TBP at the start of MESA and then dissociates during the experiment.

Based on these two approximations, it is also clear that TBP binding with DNA exists only in monomeric DNA/TBP complex. TBP dimer does not exist in the gel or in the “Well” because it dissociates during a 30 min incubation (described in “*Formation of TBP/Unmodified TATA DNA Complexes*” part of “RESULTS” section of Rechkoblit et al. 2001). So the rest of TBP exists in free form.

#### 4. Assumptions

$D_1$  has high density in the gel, so we have to decide which part (free DNA or DNA in monomeric DNA/TBP complex)  $D_1$  belongs to.

- 1) Assumption 1:  $D_1$  belongs to free DNA, if the solution environment is the gel buffer (see “MATERIALS AND METHODS” section of Rechkoblit et al. 2001). Then  $[freeDNA] = D + D_1 = D_{initial} - M = 1 \text{ nM} - M$ ,  $[monomericDNA/TBPcomplex] = M$ ,  $[freeTBP] = TBP_{initial} - M = K_d - M$ . Because  $1 \text{ nM} = 10^{-9} \text{ M}$ , we have

$$K^o = K_1^o = \frac{M \times c^o}{(K_d - M)(1 \times 10^{-9} - M)}; \quad (5)$$

Or

- 2) Assumption 2:  $D_1$  belongs to the DNA in monomeric DNA/TBP complex, if the solution environment is the reaction buffer (see “MATERIALS AND METHODS” section of Rechkoblit et al. 2001). Then  $[monomericDNA/TBPcomplex] = 50\%D_{initial} = 0.5 \text{ nM}$ ,  $[freeDNA] = 50\%D_{initial} = 0.5 \text{ nM}$ ,  $[freeTBP] = TBP_{initial} - M = K_d - 0.5 \text{ nM}$ . Because  $1 \text{ nM} = 10^{-9} \text{ M}$ , we have

$$K^o = K_2^o = \frac{0.5 \times 10^{-9} \times c^o}{(K_d - 0.5 \times 10^{-9}) \times 0.5 \times 10^{-9}} = \frac{1}{K_d - 0.5 \times 10^{-9}}. \quad (6)$$

#### 5. Results

The results are shown in Table 1 following. We use  $K_2^o$  and  $\Delta G_2^o$  in this work because Assumption 2 is more reasonable.

**Table 1: Equilibrium Constants  $K^\circ$  and Standard Gibbs Energy Changes  $\Delta G^\circ$** 

| DNA duplex                              | $K_d$ | $f_{\text{DNA}}$ | $K_1^\circ$        | $\Delta G_1^\circ$ | $K_2^\circ$        | $\Delta G_2^\circ$ |
|-----------------------------------------|-------|------------------|--------------------|--------------------|--------------------|--------------------|
| unmodified                              | 9±2   | 14±3             | $1.84 \times 10^7$ | -9.21              | $1.18 \times 10^8$ | -10.23             |
| 10S(+)- <i>trans</i> -[A <sub>1</sub> ] | 8±2   | 22±4             | $3.63 \times 10^7$ | -9.59              | $1.33 \times 10^8$ | -10.30             |
| 10R(-)- <i>trans</i> -[A <sub>1</sub> ] | 6±1   | 65±13            | $3.47 \times 10^8$ | -10.83             | $1.82 \times 10^8$ | -10.47             |
| 10S(+)- <i>trans</i> -[A <sub>2</sub> ] | 18±3  | ND               | /                  | /                  | $5.71 \times 10^7$ | -9.84              |
| 10R(-)- <i>trans</i> -[A <sub>2</sub> ] | 13±3  | 6±1              | $4.93 \times 10^6$ | -8.49              | $8.00 \times 10^7$ | -10.02             |

$K_d$  is the apparent dissociation constant evaluated by finding the TBP concentration at which 50% of the DNA is bound.  $f_{\text{DNA}}$  is the fraction of DNA in monomeric DNA/TBP complex when 50% of the DNA is bound ( $M = f_{\text{DNA}} \cdot D_{\text{initial}}$ ).  $K_1^\circ$  and  $\Delta G_1^\circ$  refer to the equilibrium constant and standard Gibbs energy change in Assumption 1 ( $D_1$  in Figure 1 belongs to free DNA), while  $K_2^\circ$  and  $\Delta G_2^\circ$  in Assumption 2 ( $D_1$  belongs to DNA in monomeric DNA/TBP complex). ND means nondetected.  $\Delta G_1^\circ$  and  $\Delta G_2^\circ$  are calculated using Equation 1, where the absolute temperature  $T = 273.15 + 4.0 = 277.15$  (K), the temperature in both the reaction buffer and gel buffer.  $K_d$  are in unit of nM,  $f_{\text{DNA}}$  in %,  $\Delta G_1^\circ$  and  $\Delta G_2^\circ$  in kcal/mol.

### Reference:

- Rechkoblit O, Krzeminsky J, Amin S, Jernstrom B, Louneva N, Geacintov NE 2001 Influence of bulky polynuclear carcinogen lesions in a TATA promoter sequence on TATA binding protein-DNA complex formation. *Biochemistry* 40:5622-5632.

## Appendix S5: Local Molecular Mechanics Interaction

### Analysis

Comprehensive binding free energy analyses are computationally expensive. Here we compute local molecular mechanics interaction energies  $\Delta E_{\text{MM}}$  to see whether we could easily interpret the experimental binding affinities. The local region is defined by 32 residues: 3-9, 22-28, 40-41, 99, 133-135, 161-163, 166, 168, 177, 179, 183-187, where residue numbers 1-32 correspond to the DNA and 33-211 to TBP. These residues are within 5 Å from the A<sub>1</sub> and A<sub>2</sub> BP-binding sites and were selected based on the trajectories of all 12 systems. Table 1 shows the electrostatic interaction energies  $\Delta E_{\text{ele}}$ , van der Waals interaction energies  $\Delta E_{\text{vdw}}$ , and molecular mechanics interaction energies  $\Delta E_{\text{MM}}$  between TBP and TATA DNA, as well as the molecular mechanics energies  $E_{\text{MM}}$  of the 12 TBP/DNA complexes. All energies are computed in the local region. The internal interaction energies  $\Delta E_{\text{int}}$  are zero and not shown because there are no covalent bonds between TBP and TATA DNA.  $\Delta E_{\text{MM}} = \Delta E_{\text{int}} + \Delta E_{\text{vdw}} + \Delta E_{\text{ele}}$ .

We can see that  $\Delta E_{\text{MM}}$  is dominated by  $\Delta E_{\text{ele}}$  because both TBP and TATA DNA are highly charged.  $\Delta E_{\text{MM}}$  differs widely, from -1068 to -1190 kcal/mol, with standard deviations around 15 to 36 kcal/mol.  $E_{\text{MM}}$  differs from -44 to -200 kcal/mol with standard deviations around 26 to 49 kcal/mol. Because the differences in both  $\Delta E_{\text{MM}}$  and  $E_{\text{MM}}$  are larger than their standard deviations, we cannot interpret the experimental binding free energy differences of <1 kcal/mol. Clearly, local molecular mechanics interaction analysis is insufficient to interpret global binding affinities.

**Table 1: Local molecular mechanics interaction energies**

| system                                       | $\Delta E_{\text{ele}}$ | $\Delta E_{\text{vdw}}$ | $\Delta E_{\text{MM}}$ | $E_{\text{MM}}$ |
|----------------------------------------------|-------------------------|-------------------------|------------------------|-----------------|
| unmodified                                   | -1063±32                | -79±4                   | -1142±32               | -151±49         |
| 10S(+)- <i>trans</i> -[A <sub>1</sub> ]: II  | <u>-1096±16</u>         | <u>-77±3</u>            | <u>-1173±15</u>        | <u>-96±31</u>   |
| III                                          | -1005±21                | -77±3                   | -1082±22               | -84±37          |
| 10R(-)- <i>trans</i> -[A <sub>1</sub> ]: II  | -1022±20                | -77±3                   | -1099±21               | -61±39          |
| III                                          | <u>-1059±27</u>         | <u>-79±3</u>            | <u>-1138±27</u>        | <u>-142±49</u>  |
| IV                                           | -1046±28                | -75±4                   | -1121±29               | -61±49          |
| 10S(+)- <i>trans</i> -[A <sub>2</sub> ]: III | -1058±21                | -75±4                   | -1133±21               | -132±35         |
| III-2                                        | <u>-1062±28</u>         | <u>-79±3</u>            | <u>-1141±27</u>        | <u>-200±43</u>  |
| IV                                           | -1054±28                | -78±3                   | -1133±29               | -152±26         |
| 10R(-)- <i>trans</i> -[A <sub>2</sub> ]: I   | <u>-1116±35</u>         | -74±3                   | <u>-1190±36</u>        | <u>-136±41</u>  |
| III                                          | -994±16                 | -74±4                   | -1068±17               | -44±35          |
| IV                                           | -1058±20                | <u>-87±4</u>            | -1145±21               | -115±38         |

$\Delta E_{\text{ele}}$ ,  $\Delta E_{\text{vdw}}$ , and  $\Delta E_{\text{MM}}$  are the electrostatic interaction energy, van der Waals interaction energy, and molecular mechanics interaction energy between TBP and TATA DNA, respectively.  $E_{\text{MM}}$  is the molecular mechanics energy of the complexes. Internal interaction energy  $E_{\text{int}}$  (not shown) is zero for all systems because there are no covalent bonds between TBP and TATA DNA.  $\Delta E_{\text{MM}}$  and  $E_{\text{MM}}$  are shown in both average and standard deviation. Underlined are the lowest energy in each of the four combinations of carcinogen location (A<sub>1</sub> or A<sub>2</sub>) and stereochemistry (10S(+)) or 10R(-)). All energies have the unit of kcal/mol and are shown in both average and standard deviations. The standard deviation of  $\Delta E_{\text{MM}}$  is not necessarily the exact accumulation of the standard deviations of  $\Delta E_{\text{ele}}$  and  $\Delta E_{\text{vdw}}$ , because part of the fluctuations of these two terms is cancelled out.

## Appendix S6: Stability of Free Energies of Unbound TBP and TATA DNA

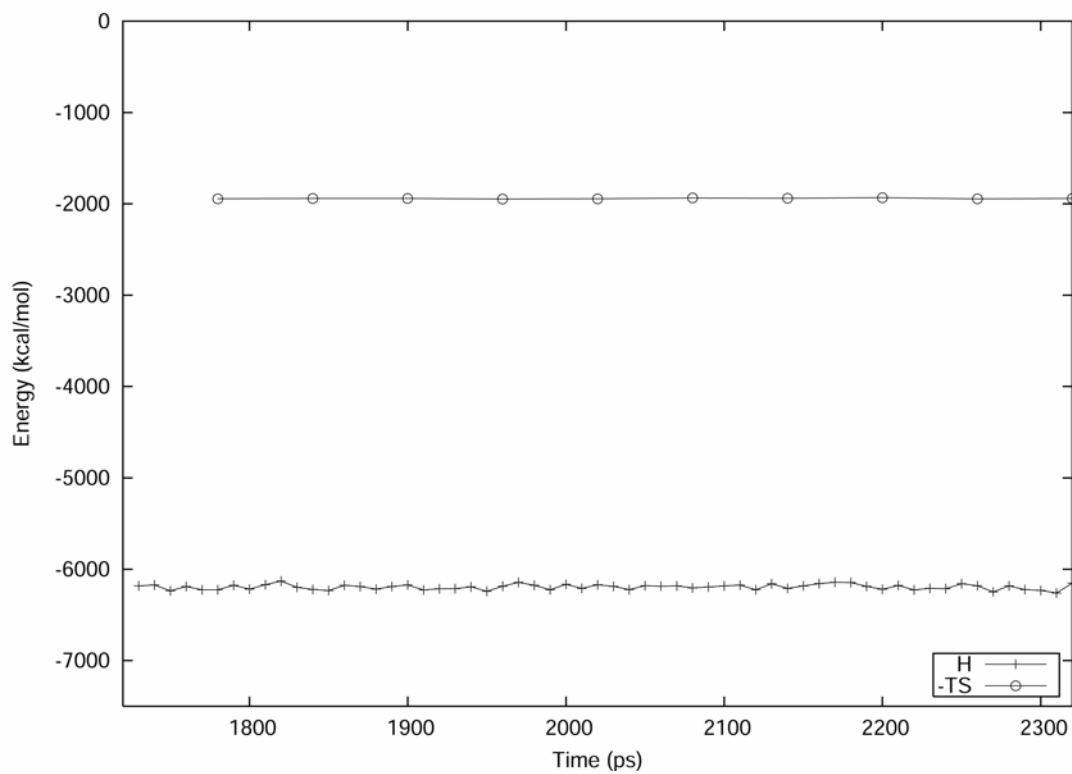

Figure 1: Free energy (enthalpy term  $H$  and entropy term  $-TS$ ) of TBP a function of simulation time between 1720 and 2320 ps, in which free energy is computed.



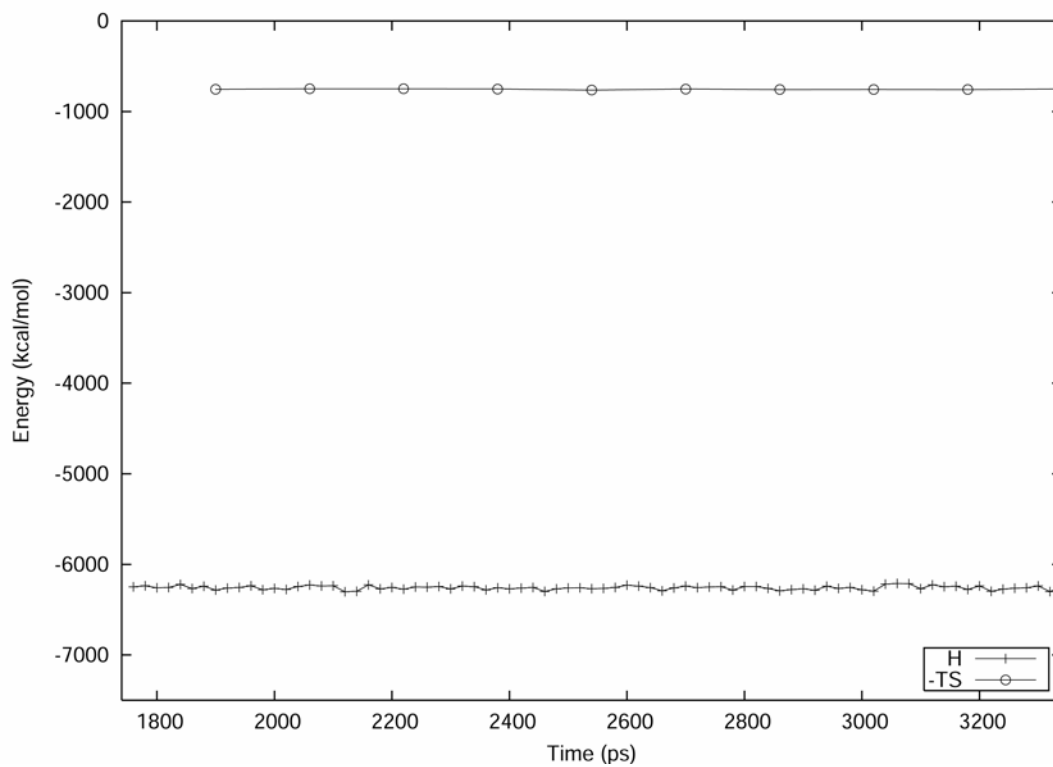

Figure 2: Free energy (enthalpy term  $H$  and entropy term  $-TS$ ) of unmodified TATA DNA as a function of simulation time between 1740 and 3340 ps, in which free energy is computed.

10S(+)-trans-[A<sub>1</sub>]: II, III

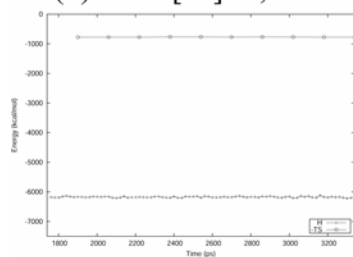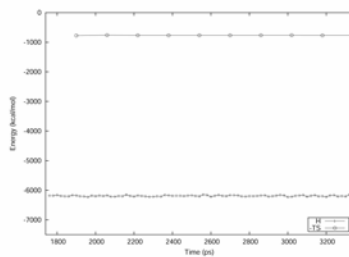

10R(-)-trans-[A<sub>1</sub>]: II, III, IV

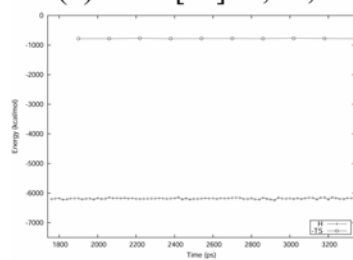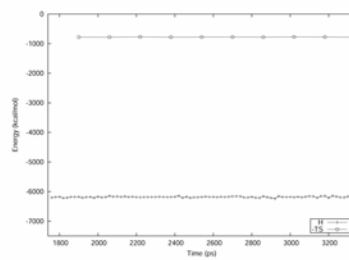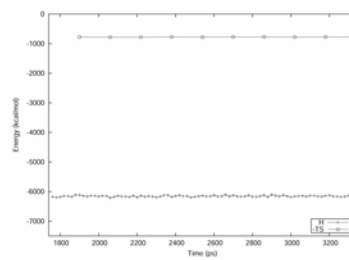

10S(+)-trans-[A<sub>2</sub>]: III, III-2, IV

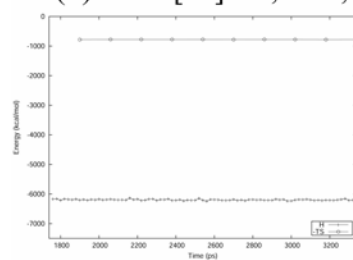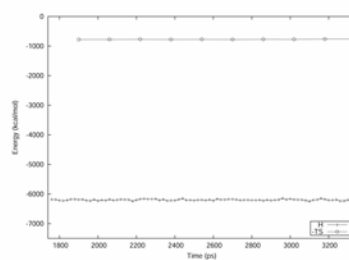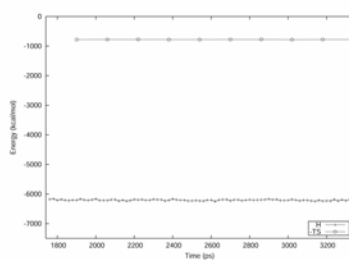

10R(-)-trans-[A<sub>2</sub>]: I, III, IV

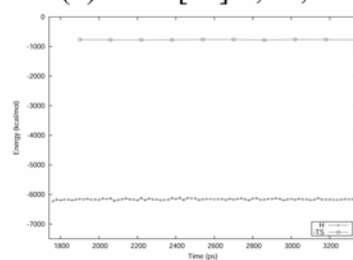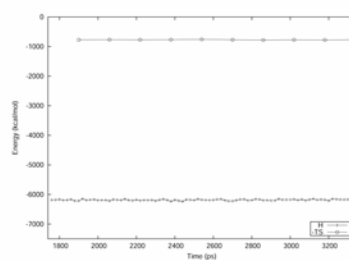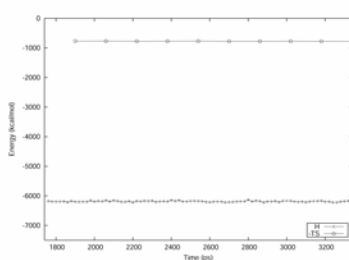

Figure 3: Free energies (enthalpy term H and entropy term  $-TS$ ) of BP-modified TATA DNA as a function of simulation time between 1740 and 3340 ps, in which free energies are computed.
